# Supplementary material
Source: Springer Nature journal article supplement (https://www.springermedizin.de/resource/supplementary/12958_2009_518_MOESM3_ESM.pdf/9568194)

Relative affinity

1.0

0.5

0.0

0

1

2

3

4

$\log [\text{pmol}]$

- ▲ KTK
- HRD
- HRD AP

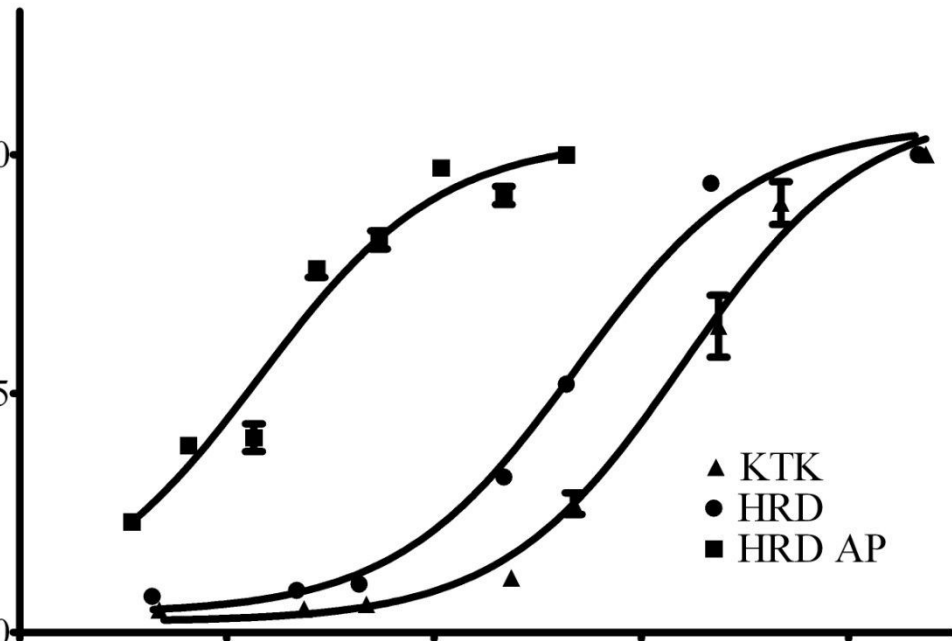

Supplement: MOESM3 [file 9568194]
